# Supplementary material
Source: PubMed Central journal article supplement (PMC1768877)
Supplement: heart_91_5_681__1.pdf [file heart_91_5_681__1.pdf]

**Assessment of diastolic function: what the general cardiologist needs to know  
(ht29413)**

**PM Mottram, TH Marwick**

**Web only references**

1. Zabalgaitia M, Rahman SN, Haley WE, *et al.* Comparison in systemic hypertension of left ventricular mass and geometry with systolic and diastolic function in patients <65 to > or = 65 years of age. *Am J Cardiol* 1998;**82**:604–8.
2. Fischer M, Baessler A, Hense HW, *et al.* Prevalence of left ventricular diastolic dysfunction in the community. Results from a Doppler echocardiographic-based survey of a population sample. *Eur Heart J* 2003;**24**:320–8.
3. Vanoverschelde JL, Robert AR, Gerbaux A, *et al.* Noninvasive estimation of pulmonary arterial wedge pressure with Doppler transmitral flow velocity pattern in patients with known heart disease. *Am J Cardiol* 1995;**75**:383–9.
4. Hunt SA, Baker DW, Chin MH, *et al.* ACC/AHA Guidelines for the Evaluation and Management of Chronic Heart Failure in the Adult: Executive Summary A Report of the American College of Cardiology/American Heart Association Task Force on Practice Guidelines. *Circulation* 2001;**104**:2996–3007.
5. Vasan RS, Benjamin EJ, Levy D. Prevalence, clinical features and prognosis of diastolic heart failure: an epidemiologic perspective. *Journal of the American College of Cardiology* 1995;**26**:1565–74.
6. Gandhi SK, Powers JC, Nomeir AM, *et al.* The pathogenesis of acute pulmonary edema associated with hypertension. *N Engl J Med* 2001;**344**:17–22.
7. Zile MR, Baicu CF, Gaasch WH. Diastolic heart failure--abnormalities in active relaxation and passive stiffness of the left ventricle. *N Engl J Med* 2004;**350**:1953–9.
8. Caruana L, Petrie MC, Davie AP, *et al.* Do patients with suspected heart failure and preserved left ventricular systolic function suffer from "diastolic heart failure" or from misdiagnosis? A prospective descriptive study. [see comments]. *BMJ* 2000;**321**:215–8.
9. Rakowski H, Appleton C, Chan KL, *et al.* Canadian consensus recommendations for the measurement and reporting of diastolic dysfunction by echocardiography: from the Investigators of Consensus on Diastolic Dysfunction by Echocardiography. *J Am Soc Echocardiogr* 1996;**9**:736–60.
10. Hasegawa H, Little WC, Ohno M, *et al.* Diastolic mitral annular velocity during the development of heart failure. *J Am Coll Cardiol* 2003;**41**:1590–7.
11. Heimdal A, Stoylen A, Torp H, *et al.* Real-time strain rate imaging of the left ventricle by ultrasound. *J Am Soc Echocardiogr* 1998;**11**:1013–9.
12. Galiuto L, Ignone G, DeMaria AN. Contraction and relaxation velocities of the normal left ventricle using pulsed-wave tissue Doppler echocardiography. *Am J Cardiol* 1998;**81**:609–14.
13. Pasquet A, Armstrong G, Beachler L, *et al.* Use of segmental tissue Doppler velocity to quantitate exercise echocardiography. *J Am Soc Echocardiogr* 1999;**12**:901–12.

14. Farias CA, Rodriguez L, Garcia MJ, *et al.* Assessment of diastolic function by tissue Doppler echocardiography: comparison with standard transmitral and pulmonary venous flow. *J Am Soc Echocardiogr* 1999;**12**:609–17.
15. Nikitin NP, Witte KK, Thackray SD, *et al.* Longitudinal ventricular function: normal values of atrioventricular annular and myocardial velocities measured with quantitative two-dimensional color Doppler tissue imaging. *J Am Soc Echocardiogr* 2003;**16**:906–21.
16. De Boeck BW, Cramer MJ, Oh JK, *et al.* Spectral pulsed tissue Doppler imaging in diastole: a tool to increase our insight in and assessment of diastolic relaxation of the left ventricle. *Am Heart J* 2003;**146**:411–9.
17. Rodriguez L, Garcia M, Ares M, *et al.* Assessment of mitral annular dynamics during diastole by Doppler tissue imaging: comparison with mitral Doppler inflow in subjects without heart disease and in patients with left ventricular hypertrophy. *Am Heart J* 1996;**131**:982–7.
18. Peverill RE, Gelman JS, Mottram PM, *et al.* Factors associated with mitral annular systolic and diastolic velocities in healthy adults. *J Am Soc Echocardiogr* 2004;**17**:1146–54.
19. Rivas-Gotz C, Manolios M, Thohan V, *et al.* Impact of left ventricular ejection fraction on estimation of left ventricular filling pressures using tissue Doppler and flow propagation velocity. *Am J Cardiol* 2003;**91**:780–4.
20. Firstenberg MS, Levine BD, Garcia MJ, *et al.* Relationship of echocardiographic indices to pulmonary capillary wedge pressures in healthy volunteers. *J Am Coll Cardiol* 2000;**36**:1664–9.
21. Nagueh SF, Mikati I, Kopelen HA, *et al.* Doppler estimation of left ventricular filling pressure in sinus tachycardia. A new application of tissue doppler imaging. *Circulation* 1998;**98**:1644–50.
22. Sohn DW, Song JM, Zo JH, *et al.* Mitral annulus velocity in the evaluation of left ventricular diastolic function in atrial fibrillation. *J Am Soc Echocardiogr* 1999;**12**:927–31.
23. Nagueh SF, Lakkis NM, Middleton KJ, *et al.* Doppler estimation of left ventricular filling pressures in patients with hypertrophic cardiomyopathy. *Circulation* 1999;**99**:254–61.
24. Nagueh SF, Rao L, Soto J, *et al.* Hemodynamic insights into the effects of ischemia and cycle length on tissue doppler-derived mitral annulus diastolic velocities. *Clin Sci (Lond)* 2003.
25. Henein MY, Gibson DG. Normal long axis function. *Heart* 1999;**81**:111–3.
26. Keren G, Sonnenblick EH, LeJemtel TH. Mitral anulus motion. Relation to pulmonary venous and transmitral flows in normal subjects and in patients with dilated cardiomyopathy. *Circulation* 1988;**78**:621–9.
27. Klein AL, Burstow DJ, Tajik AJ, *et al.* Effects of age on left ventricular dimensions and filling dynamics in 117 normal persons. *Mayo Clin Proc* 1994;**69**:212–24.
28. Rossvoll O, Hatle LK. Pulmonary venous flow velocities recorded by transthoracic Doppler ultrasound: relation to left ventricular diastolic pressures. *J Am Coll Cardiol* 1993;**21**:1687–96.

29. Brunazzi MC, Chirillo F, Pasqualini M, *et al.* Estimation of left ventricular diastolic pressures from precordial pulsed-Doppler analysis of pulmonary venous and mitral flow. *Am Heart J* 1994;**128**:293–300.
30. Yamamoto K, Nishimura RA, Chaliki HP, *et al.* Determination of left ventricular filling pressure by Doppler echocardiography in patients with coronary artery disease: critical role of left ventricular systolic function. *J Am Coll Cardiol* 1997;**30**:1819–26.
31. Poerner TC, Goebel B, Unglaub P, *et al.* Detection of a pseudonormal mitral inflow pattern: an echocardiographic and tissue Doppler study. *Echocardiography* 2003;**20**:345–56.
32. Choong CY, Herrmann HC, Weyman AE, *et al.* Preload dependence of Doppler-derived indexes of left ventricular diastolic function in humans. *J Am Coll Cardiol* 1987;**10**:800–8.
33. Zabalgoitia M, Ismaeil MF, Anderson L, *et al.* Prevalence of diastolic dysfunction in normotensive, asymptomatic patients with well-controlled type 2 diabetes mellitus. *Am J Cardiol* 2001;**87**:320–3.
34. Hurrell DG, Nishimura RA, Ilstrup DM, *et al.* Utility of preload alteration in assessment of left ventricular filling pressure by Doppler echocardiography: a simultaneous catheterization and Doppler echocardiographic study. *J Am Coll Cardiol* 1997;**30**:459–67.
35. Dumesnil JG, Gaudreault G, Honos GN, *et al.* Use of Valsalva maneuver to unmask left ventricular diastolic function abnormalities by Doppler echocardiography in patients with coronary artery disease or systemic hypertension. *Am J Cardiol* 1991;**68**:515–9.
36. Garcia MJ, Smedira NG, Greenberg NL, *et al.* Color M-mode Doppler flow propagation velocity is a preload insensitive index of left ventricular relaxation: animal and human validation. *J Am Coll Cardiol* 2000;**35**:201–8.
37. Garcia MJ, Ares MA, Asher C, *et al.* An index of early left ventricular filling that combined with pulsed Doppler peak E velocity may estimate capillary wedge pressure. *J Am Coll Cardiol* 1997;**29**:448–54.
38. Ohte N, Narita H, Akita S, *et al.* Striking effect of left ventricular systolic performance on propagation velocity of left ventricular early diastolic filling flow. *J Am Soc Echocardiogr* 2001;**14**:1070–4.
39. Graham RJ, Gelman JS, Donelan L, *et al.* Effect of preload reduction by haemodialysis on new indices of diastolic function. *Clin Sci (Lond)* 2003;**105**:499–506.
40. De Mey S, De Sutter J, Vierendeels J, *et al.* Diastolic filling and pressure imaging: taking advantage of the information in a colour M-mode Doppler image. *Eur J Echocardiogr* 2001;**2**:219–33.
41. Sessoms MW, Lisauskas J, Kovacs SJ. The left ventricular color M-mode Doppler flow propagation velocity V(p): in vivo comparison of alternative methods including physiologic implications. *J Am Soc Echocardiogr* 2002;**15**:339–48.
42. Ren JF, Pancholy SB, Iskandrian AS, *et al.* Doppler echocardiographic evaluation of the spectrum of left ventricular diastolic dysfunction in essential hypertension. *Am Heart J* 1994;**127**:906–13.

43. Schillaci G, Pasqualini L, Verdecchia P, *et al.* Prognostic significance of left ventricular diastolic dysfunction in essential hypertension. *J Am Coll Cardiol* 2002;**39**:2005–11.
44. Mantero A, Gentile F, Azzollini M, *et al.* Effect of sample volume location on Doppler-derived transmitral inflow velocity values in 288 normal subjects 20 to 80 years old: an echocardiographic, two-dimensional color Doppler cooperative study. *Journal of the American Society of Echocardiography* 1998;**11**:280–8.
45. Yuda S, Short L, Leano R, *et al.* Abnormal left ventricular filling with increasing age reflects abnormal myocardial characteristics independent of ischemia or hypertrophy. *Am J Cardiol* 2003;**91**:63–7.
46. Galderisi M, Benjamin EJ, Evans JC, *et al.* Impact of heart rate and PR interval on Doppler indexes of left ventricular diastolic filling in an elderly cohort (the Framingham Heart Study). *Am J Cardiol* 1993;**72**:1183–7.
47. Ha JW, Lulic F, Bailey KR, *et al.* Effects of treadmill exercise on mitral inflow and annular velocities in healthy adults. *Am J Cardiol* 2003;**91**:114–5.
48. Zile MR, Blaustein AS, Shimizu G, *et al.* Right ventricular pacing reduces the rate of left ventricular relaxation and filling. *J Am Coll Cardiol* 1987;**10**:702–9.
49. Xiao HB, Lee CH, Gibson DG. Effect of left bundle branch block on diastolic function in dilated cardiomyopathy. *Br Heart J* 1991;**66**:443–7.
50. Sadaniantz A, Saint Laurent L. Left ventricular Doppler diastolic filling patterns in patients with isolated left bundle branch block. *Am J Cardiol* 1998;**81**:643–5.
51. Henein MY, Gibson DG. Long axis function in disease. *Heart* 1999;**81**:229–31.
52. Mahmud E, Raisinghani A, Hassankhani A, *et al.* Correlation of left ventricular diastolic filling characteristics with right ventricular overload and pulmonary artery pressure in chronic thromboembolic pulmonary hypertension. *J Am Coll Cardiol* 2002;**40**:318–24.
53. Hatle L. Doppler echocardiographic evaluation of diastolic function in hypertensive cardiomyopathies. *Eur Heart J* 1993;**14**(Suppl J):88–94.
54. Douglas PS. The left atrium: A biomarker of chronic diastolic dysfunction and cardiovascular disease risk. *Journal of the American College of Cardiology* 2003;**42**:1206–1207.
55. Nagueh SF. The search for non invasive load-independent indices of left ventricular relaxation. *Clin Sci (Lond)* 2003.
56. Khan IA. Atrial stunning: determinants and cellular mechanisms. *Am Heart J* 2003;**145**:787–94.
57. Khankirawatana B, Khankirawatana S, Peterson B, *et al.* Peak atrial systolic mitral annular velocity by Doppler tissue reliably predicts left atrial systolic function. *J Am Soc Echocardiogr* 2004;**17**:353–60.
58. Temporelli PL, Scapellato F, Corra U, *et al.* Estimation of pulmonary wedge pressure by transmitral Doppler in patients with chronic heart failure and atrial fibrillation. *Am J Cardiol* 1999;**83**:724–7.
59. Traversi E, Cobelli F, Pozzoli M. Doppler echocardiography reliably predicts pulmonary artery wedge pressure in patients with chronic heart failure even when atrial fibrillation is present. *European Journal of Heart Failure* 2001;**3**:173–181.

60. Yasue H, Yoshimura M, Sumida H, *et al.* Localization and mechanism of secretion of B-type natriuretic peptide in comparison with those of A-type natriuretic peptide in normal subjects and patients with heart failure. *Circulation* 1994;**90**:195–203.
61. Boomsma F, van den Meiracker AH. Plasma A- and B-type natriuretic peptides: physiology, methodology and clinical use. *Cardiovasc Res* 2001;**51**:442–9.
62. Nakamura M, Endo H, Nasu M, *et al.* Value of plasma B type natriuretic peptide measurement for heart disease screening in a Japanese population. *Heart* 2002;**87**:131–5.
63. Davis M, Espiner E, Richards G, *et al.* Plasma brain natriuretic peptide in assessment of acute dyspnoea. *Lancet* 1994;**343**:440–4.
64. Maisel AS, Krishnaswamy P, Nowak RM, *et al.* Rapid measurement of B-type natriuretic peptide in the emergency diagnosis of heart failure. *N Engl J Med* 2002;**347**:161–7.
65. Lubien E, DeMaria A, Krishnaswamy P, *et al.* Utility of B-natriuretic peptide in detecting diastolic dysfunction: comparison with Doppler velocity recordings. *Circulation* 2002;**105**:595–601.
66. Maisel AS, McCord J, Nowak RM, *et al.* Bedside B-Type natriuretic peptide in the emergency diagnosis of heart failure with reduced or preserved ejection fraction. Results from the Breathing Not Properly Multinational Study. *J Am Coll Cardiol* 2003;**41**:2010–7.
67. Kitzman DW, Little WC, Brubaker PH, *et al.* Pathophysiological characterization of isolated diastolic heart failure in comparison to systolic heart failure. *JAMA* 2002;**288**:2144–50.
68. Redfield MM, Rodeheffer RJ, Jacobsen SJ, *et al.* Plasma brain natriuretic peptide concentration: impact of age and gender. *J Am Coll Cardiol* 2002;**40**:976–82.
69. Massie BM. Natriuretic peptide measurements for the diagnosis of "nonsystolic" heart failure: good news and bad. *J Am Coll Cardiol* 2003;**41**:2018–21.
70. Mottram PM, Leano R, Marwick TH. Usefulness of B-type natriuretic peptide in hypertensive patients with exertional dyspnea and normal left ventricular ejection fraction and correlation with new echocardiographic indexes of systolic and diastolic function. *Am J Cardiol* 2003;**92**:1434–8.
71. Cheung BM, Brown MJ. Plasma brain natriuretic peptide and C-type natriuretic peptide in essential hypertension. *J Hypertens* 1994;**12**:449–54.
72. Yasumoto K, Takata M, Ueno H, *et al.* Relation of plasma brain and atrial natriuretic peptides to left ventricular geometric patterns in essential hypertension. *Am J Hypertens* 1999;**12**:921–4.
73. Sayama H, Nakamura Y, Saito N, *et al.* Relationship between left ventricular geometry and brain natriuretic peptide levels in elderly subjects. *Gerontology* 2000;**46**:71–7.
74. Suzuki M, Hamada M, Yamamoto K, *et al.* Brain natriuretic peptide as a risk marker for incident hypertensive cardiovascular events. *Hypertens Res* 2002;**25**:669–76.
75. Vasan RS, Benjamin EJ, Larson MG, *et al.* Plasma natriuretic peptides for community screening for left ventricular hypertrophy and systolic dysfunction: the Framingham heart study. *JAMA* 2002;**288**:1252–9.

76. Mottram PM, Haluska BA, Marwick TH. Response of B-type natriuretic peptide to exercise in hypertensive patients with suspected diastolic heart failure: correlation with cardiac function, hemodynamics, and workload. *Am Heart J* 2004;**148**:365–70.
77. Mottram PM, Haluska B, Yuda S, *et al.* Patients with a hypertensive response to exercise have impaired systolic function without diastolic dysfunction or left ventricular hypertrophy. *J Am Coll Cardiol* 2004;**43**:848–53.
78. Leite-Moreira AF, Correia-Pinto J, Gillebert TC. Afterload induced changes in myocardial relaxation: a mechanism for diastolic dysfunction. *Cardiovasc Res* 1999;**43**:344–53.
79. Bonow RO, Udelson JE. Left ventricular diastolic dysfunction as a cause of congestive heart failure. Mechanisms and management. *Ann Intern Med* 1992;**117**:502–10.
80. Edvardsen T, Gerber BL, Garot J, *et al.* Quantitative assessment of intrinsic regional myocardial deformation by Doppler strain rate echocardiography in humans: validation against three-dimensional tagged magnetic resonance imaging. *Circulation* 2002;**106**:50–6.
81. Poulsen SH, Andersen NH, Ivarsen PI, *et al.* Doppler tissue imaging reveals systolic dysfunction in patients with hypertension and apparent "isolated" diastolic dysfunction. *J Am Soc Echocardiogr* 2003;**16**:724–31.
82. Fang ZY, Yuda S, Anderson V, *et al.* Echocardiographic detection of early diabetic myocardial disease. *J Am Coll Cardiol* 2003;**41**:611–7.
83. Koyama J, Ray-Sequin PA, Falk RH. Longitudinal myocardial function assessed by tissue velocity, strain, and strain rate tissue Doppler echocardiography in patients with AL (primary) cardiac amyloidosis. *Circulation* 2003;**107**:2446–52.
84. Picano E, Pelosi G, Marzilli M, *et al.* In vivo quantitative ultrasonic evaluation of myocardial fibrosis in humans. *Circulation* 1990;**81**:58–64.
85. Wickline SA, Thomas LJ 3rd, Miller JG, *et al.* The dependence of myocardial ultrasonic integrated backscatter on contractile performance. *Circulation* 1985;**72**:183–92.
86. Yuda S, Short L, Leano R, *et al.* Myocardial abnormalities in hypertensive patients with normal and abnormal left ventricular filling: a study of ultrasound tissue characterization and strain. *Clin Sci (Lond)* 2002;**103**:283–93.
87. Kim HK, Kim YJ, Cho YS, *et al.* Determinants of exercise capacity in hypertensive patients: new insights from tissue Doppler echocardiography. *Am J Hypertens* 2003;**16**:564–9.
88. Oki T, Tabata T, Yamada H, *et al.* Left ventricular diastolic properties of hypertensive patients measured by pulsed tissue Doppler imaging. *J Am Soc Echocardiogr* 1998;**11**:1106–12.
89. Fang ZY, Najos-Valencia O, Leano R, *et al.* Patients with early diabetic heart disease demonstrate a normal myocardial response to dobutamine. *J Am Coll Cardiol* 2003;**42**:446–53.
90. Palka P, Lange A, Donnelly JE, *et al.* Doppler tissue echocardiographic features of cardiac amyloidosis. *J Am Soc Echocardiogr* 2002;**15**:1353–60.
91. Nagueh SF, McFalls J, Meyer D, *et al.* Tissue Doppler imaging predicts the development of hypertrophic cardiomyopathy in subjects with subclinical disease. *Circulation* 2003;**108**:395–8.

92. Shan K, Bick RJ, Poindexter BJ, *et al.* Relation of tissue Doppler derived myocardial velocities to myocardial structure and beta-adrenergic receptor density in humans. *J Am Coll Cardiol* 2000;**36**:891–6.
93. Voigt JU, Lindenmeier G, Werner D, *et al.* Strain rate imaging for the assessment of preload-dependent changes in regional left ventricular diastolic longitudinal function. *J Am Soc Echocardiogr* 2002;**15**:13–9.
94. Fonseca CG, Oxenham HC, Cowan BR, *et al.* Aging alters patterns of regional nonuniformity in LV strain relaxation: a 3-D MR tissue tagging study. *Am J Physiol Heart Circ Physiol* 2003;**285**:H621–30.
95. Diamant M, Lamb HJ, Groeneveld Y, *et al.* Diastolic dysfunction is associated with altered myocardial metabolism in asymptomatic normotensive patients with well-controlled type 2 diabetes mellitus. *J Am Coll Cardiol* 2003;**42**:328–35.
96. de Marchi SF, Bodenmuller M, Lai DL, *et al.* Pulmonary venous flow velocity patterns in 404 individuals without cardiovascular disease. *Heart* 2001;**85**:23–9.
